# Supplementary material for: Occurrence, Concentration and Toxicity of 54 Polycyclic Aromatic Hydrocarbons in Butter during Storage
Source: MDPI journal article supplement (doi:10.3390/foods12244393), 2023-12-06
Supplement: s1 [file s1]

## **Supporting Information**

### **Occurrence, Concentration and Toxicity of 54 Polycyclic Aromatic Hydrocarbons in Butter during Storage**

Jianqiang Lan, Shimin Wu\*

Department of Food Science and Technology, School of Agriculture and Biology, Shanghai Jiao  
Tong University, 800 Dongchuan Road, Shanghai 200240, China

\* Corresponding author: Tel./Fax: +86 21 34205717; E-mail: [wushimin@sjtu.edu.cn](mailto:wushimin@sjtu.edu.cn)

**Table S1** Nutrition facts for 21 butter types and 5 margarine types

| Sample   | Fat (g/100g) | Protein (g/100g) | Carbohydrate (g/100g) | Na (mg/100g) | Shelf life (Mon) |
|----------|--------------|------------------|-----------------------|--------------|------------------|
| B1(AN*)  | 82.0         | 0.7              | 1.0                   | 12           | 12               |
| B2(AY)   | 80.0         | 0.7              | 1.0                   | 800          | 12               |
| B3       | 82.0         | 0.7              | 0.9                   | 20           | 12               |
| B4       | 80.0         | 0.7              | 0.9                   | 750          | 12               |
| B5       | 82.0         | 0.7              | 0.8                   | 20           | 12               |
| B6(BN)   | 82.9         | 0.6              | 0.6                   | 10           | 18               |
| B7(BY)   | 81.4         | 0.6              | 0.6                   | 600          | 20               |
| B8       | 82.8         | 0.0              | 0.0                   | 11           | 24               |
| B9       | 81.6         | 0.0              | 0.0                   | 531          | 24               |
| B10      | 82.0         | 0.7              | 0.6                   | 0            | 12               |
| B11(CN*) | 82.1         | 0.6              | 0.6                   | 0            | 24               |
| B12      | 82.0         | 1.0              | 1.0                   | 0            | 24               |
| B13(EN*) | 82.0         | 0.6              | 0.6                   | 8            | 18               |
| B14(EY)  | 80.0         | 0.6              | 0.6                   | 730          | 18               |
| B15(DN)  | 82.1         | 0.6              | 0.6                   | 0            | 24               |
| B16(DY)  | 81.0         | 0.6              | 0.6                   | 550          | 24               |
| B17      | 82.0         | 0.7              | 0.6                   | 16           | 12               |
| B18      | 96.0         | 0.0              | 0.9                   | 268          | 12               |
| B19      | 99.8         | 0.0              | 0.0                   | 40           | 12               |
| B20      | 99.8         | 0.0              | 0.0                   | 40           | 12               |
| B21      | 83.0         | 0.6              | 0.6                   | 10           | 12               |
| M1       | 82.0         | 0.0              | 0.0                   | 590          | 12               |
| M2       | 83.0         | 0.0              | 0.0                   | 500          | 12               |
| M3       | 81.0         | 0.0              | 0.0                   | 179          | 12               |
| M4       | 81.0         | 0.0              | 0.0                   | 0            | 12               |
| M5       | 84.0         | 0.0              | 1.2                   | 0            | 12               |

**Table S2** Experimental conditions of MRM modes of GC-QqQ-MS for 24 PAHs.

| PAHs   | RT (min) | Quantitative ion (m/z) | Collision energy (eV) | Qualitative ion (m/z) | Collision energy (eV) |
|--------|----------|------------------------|-----------------------|-----------------------|-----------------------|
| Nap    | 4.076    | 128.0>102.0            | 25                    | 128.0>78.0            | 30                    |
| Ap     | 6.157    | 152.0>151.0            | 25                    | 152.0>126.0           | 25                    |
| Ac     | 6.331    | 154.0>153.0            | 20                    | 153.0>152.0           | 25                    |
| F      | 7.072    | 166.0>165.0            | 25                    | 166.0>115.0           | 40                    |
| Phe    | 9.364    | 178.0>152.0            | 25                    | 178.0>177.0           | 20                    |
| Ant    | 9.448    | 178.0>152.0            | 25                    | 178.0>177.0           | 20                    |
| Flu    | 13.364   | 202.0>200.0            | 40                    | 202.0>201.0           | 30                    |
| Pyr    | 14.477   | 202.0>200.0            | 40                    | 202.0>201.0           | 30                    |
| BcF    | 16.143   | 216.0>215.0            | 30                    | 216.0>190.0           | 35                    |
| BaA    | 20.61    | 228.0>226.0            | 40                    | 226.0>225.0           | 35                    |
| CP     | 20.906   | 226.0>225.0            | 35                    | 226.0>224.0           | 40                    |
| Chr    | 21.093   | 228.0>226.0            | 40                    | 226.0>225.0           | 35                    |
| 5-MChr | 23.789   | 242.0>241.0            | 20                    | 242.0>215.0           | 25                    |
| BbF    | 27.516   | 252.0>250.0            | 40                    | 252.0>226.0           | 40                    |
| BkF    | 27.697   | 252.0>250.0            | 40                    | 252.0>226.0           | 40                    |
| BjF    | 27.849   | 252.0>250.0            | 40                    | 252.0>226.0           | 40                    |
| BaP    | 30.031   | 252.0>250.0            | 40                    | 252.0>226.0           | 40                    |
| IP     | 36.424   | 138.0>137.0            | 20                    | 276.0>275.0           | 40                    |
| DahA   | 36.606   | 278.0>276.0            | 40                    | 138.0>137.0           | 20                    |
| BghiPE | 37.983   | 276.0>274.0            | 40                    | 276.0>275.0           | 40                    |
| DBaP   | 43.179   | 302.0>300.0            | 40                    | 302.0>301.0           | 30                    |
| DBaP   | 44.959   | 302.0>300.0            | 40                    | 302.0>301.0           | 30                    |
| DBaP   | 46.064   | 302.0>301.0            | 30                    | 302.0>300.0           | 40                    |
| DBaP   | 46.72    | 302.0>300.0            | 40                    | 302.0>301.0           | 30                    |

Experimental conditions of MRM modes of GC-QqQ-MS for other PAH derivatives were provided in our previous study [1].

**Table S3** Concentrations of PAH24 in butter and margarines (µg/kg)

| Sample   | Nap         | Ap         | Ac        | F         | Phe        | Ant       | Flu        | Pyr        | BcF       | BaA       | Chr       | BbF       | BkF       | BjF       | BaP       | DahA      | BghiPE    |
|----------|-------------|------------|-----------|-----------|------------|-----------|------------|------------|-----------|-----------|-----------|-----------|-----------|-----------|-----------|-----------|-----------|
| B1(AN*)  | 60.2±0.1    | 6.8±0.3    | 1.25±0.06 | 6.19±0.02 | 25.5±0.5   | 2.01±0.01 | 12.2±0.4   | 38.95±0.01 | 2.47±0.00 | 2.05±0.01 | 4.12±0.04 | 1.05±0.03 | 0.45±0.01 | 0.68±0.01 | 1.31±0.01 | n.q.      | 0.38±0.03 |
| B2(AY)   | 80.6±0.3    | 6.8±0.2    | 1.06±0.07 | 5.07±0.06 | 23.5±0.6   | n.q.      | 12.0±0.2   | 47.5±0.2   | 1.94±0.03 | 1.26±0.01 | n.q.      | 0.93±0.02 | 0.44±0.02 | 0.60±0.00 | 1.23±0.02 | 0.47±0.01 | 0.3±0.1   |
| B3       | 51.7±0.4    | 10.6±0.6   | 1.15±0.00 | 5.7±0.2   | 25.62±0.03 | 1.87±0.01 | 8.8±0.2    | 41.9±0.6   | 1.57±0.00 | 1.00±0.02 | n.q.      | 0.69±0.01 | 0.35±0.01 | 0.56±0.00 | 1.15±0.00 | n.q.      | 0.29±0.00 |
| B4       | 40.37±0.01  | 9.3±0.3    | 1.5±0.4   | 5.8±0.1   | 26.09±0.06 | 2.39±0.04 | 12.9±0.2   | 39.2±0.3   | 1.89±0.01 | 0.91±0.05 | n.q.      | 0.69±0.00 | 0.35±0.00 | 0.55±0.01 | 1.1±0.1   | n.q.      | n.q.      |
| B5       | 45.0±0.3    | 8.5±0.5    | 1.17±0.07 | 4.8±0.4   | 13.3±0.3   | n.q.      | 6.1±0.2    | 25.56±0.09 | 1.31±0.04 | 0.95±0.03 | n.q.      | 0.69±0.00 | 0.34±0.00 | 0.55±0.00 | 1.05±0.00 | n.q.      | n.q.      |
| B6(BN)   | 47.1±0.1    | 12.9±0.5   | 1.17±0.08 | 5.2±0.2   | 21.1±0.5   | 2.27±0.08 | 11.45±0.02 | 31.1±0.2   | 1.92±0.01 | 1.64±0.01 | 0.37±0.00 | 1.03±0.01 | 0.43±0.01 | 0.67±0.00 | 1.25±0.02 | n.q.      | 0.31±0.00 |
| B7(BY)   | 77.3±0.5    | 7.7±0.7    | 1.53±0.03 | 5.37±0.04 | 22.8±0.1   | n.q.      | 12.37±0.02 | 42.0±0.7   | 1.7±0.1   | 1.37±0.03 | n.q.      | 0.91±0.01 | 0.42±0.01 | 0.62±0.00 | 1.22±0.02 | n.q.      | 0.30±0.00 |
| B8       | 34.62±0.09  | 6.45±0.02  | 0.92±0.06 | 3.3±0.1   | 14.4±0.2   | 1.06±0.04 | 4.6±0.1    | 4.2±0.2    | 1.43±0.04 | 0.93±0.01 | n.q.      | 0.66±0.00 | n.q.      | 0.54±0.00 | 1.03±0.01 | n.q.      | n.q.      |
| B9       | 18.4±0.3    | 9.4±0.5    | 1.69±0.03 | 5.7±0.2   | 21.63±0.04 | n.q.      | 6.5±0.2    | 6.02±0.07  | 1.38±0.03 | 1.01±0.00 | n.q.      | 0.70±0.01 | 0.36±0.01 | 0.56±0.00 | 1.01±0.01 | n.q.      | n.q.      |
| B10      | 15.5±0.2    | 11.33±0.04 | 0.87±0.06 | 4.43±0.02 | 14.6±0.2   | n.q.      | 3.61±0.07  | 3.67±0.00  | 1.41±0.02 | 0.97±0.00 | n.q.      | 0.74±0.00 | 0.39±0.00 | 0.56±0.01 | 1.04±0.01 | n.q.      | n.q.      |
| B11(CN*) | 78.6±1.0    | 10.5±0.7   | 1.87±0.09 | 9.9±0.2   | 45.5±0.2   | n.q.      | 22.18±0.08 | 55.50±0.07 | 2.7±0.4   | 1.68±0.02 | 6.9±0.2   | 1.10±0.03 | 0.46±0.02 | 0.67±0.00 | 1.60±0.00 | n.q.      | 0.4±0.1   |
| B12      | 18.01±0.06  | 10.5±0.2   | 3.73±0.09 | 18.7±0.3  | 70.2±0.3   | n.q.      | 10.40±0.03 | 11.3±0.2   | 3.1±0.2   | 1.29±0.00 | 1.8±0.1   | 0.68±0.00 | 0.39±0.01 | 0.74±0.00 | n.q.      | n.q.      | n.q.      |
| B13(EN*) | 131.86±0.00 | 15.4±0.5   | 1.26±0.02 | 11.0±0.3  | 42.3±0.3   | 1.9±0.2   | 17.7±0.3   | 75.8±0.3   | 2.38±0.08 | 1.30±0.05 | 5.3±0.1   | 1.69±0.00 | 0.43±0.02 | 0.62±0.00 | 1.34±0.00 | n.q.      | 0.42±0.01 |
| B14(EY)  | 73.27±0.04  | 4.6±0.3    | 0.50±0.02 | 1.87±0.07 | 10.43±0.01 | 1.00±0.01 | 7.6±0.1    | 45.8±0.5   | 1.27±0.05 | 1.11±0.06 | n.q.      | 0.83±0.03 | 0.43±0.02 | 0.58±0.00 | 1.14±0.01 | n.q.      | 0.33±0.00 |
| B15(DN)  | 14.3±0.3    | 17.2±1.3   | 2.8±0.2   | 16.0±0.1  | 69.1±0.2   | n.q.      | 4.1±0.2    | 5.1±0.2    | 1.32±0.01 | 0.94±0.06 | 1.26±0.08 | 0.71±0.02 | 0.38±0.00 | 0.74±0.00 | n.q.      | n.q.      | n.q.      |
| B16(DY)  | 129.4±0.2   | 20.8±1.1   | 1.32±0.03 | 7.6±0.7   | 31.1±0.1   | n.q.      | 19.7±0.3   | 68.3±0.7   | 2.69±0.05 | 2.63±0.01 | 1.78±0.03 | 1.04±0.03 | 0.51±0.00 | 0.75±0.00 | 1.47±0.01 | n.q.      | 0.37±0.00 |
| B17      | 19.42±0.01  | 3.0±0.3    | 0.41±0.03 | 1.24±0.01 | 2.58±0.04  | 0.32±0.00 | 4.9±0.3    | 20.9±0.3   | 1.12±0.02 | 0.81±0.02 | n.q.      | 0.69±0.00 | 0.36±0.01 | 0.55±0.00 | 1.04±0.01 | n.q.      | n.q.      |
| B18      | 14.92±0.05  | 2.3±0.1    | 0.42±0.01 | 1.18±0.04 | 7.6±0.2    | 0.99±0.01 | 4.6±0.4    | 13.4±0.2   | 1.73±0.01 | 0.91±0.04 | n.q.      | 0.67±0.00 | 0.35±0.01 | 0.55±0.00 | 1.03±0.02 | n.q.      | 0.17±0.01 |
| B19      | 18.2±0.3    | 3.93±0.04  | 0.52±0.01 | 3.56±0.08 | 11.42±0.09 | 0.95±0.00 | 5.7±0.1    | 16.3±0.6   | 2.25±0.03 | 1.37±0.04 | n.q.      | 0.79±0.00 | 0.38±0.00 | 0.60±0.00 | 1.13±0.03 | n.q.      | n.q.      |
| B20      | 43.0±0.6    | 6.90±0.02  | 0.51±0.01 | 1.50±0.03 | 8.50±0.06  | 0.43±0.01 | 6.9±0.1    | 40.9±0.1   | 2.26±0.03 | 1.02±0.03 | n.q.      | 0.73±0.00 | 0.37±0.00 | 0.57±0.00 | 1.02±0.02 | n.q.      | n.q.      |
| B21      | 38.3±0.7    | 8.8±0.5    | 1.0±0.2   | 5.9±0.1   | 25.31±0.02 | 1.61±0.05 | 7.90±0.01  | 30.26±0.07 | 1.34±0.07 | 0.84±0.02 | n.q.      | 0.67±0.01 | 0.35±0.00 | 0.55±0.00 | 1.04±0.02 | n.q.      | 0.23±0.01 |
| M1       | 63.8±0.2    | 7.2±0.5    | 0.96±0.05 | 6.03±0.09 | 6.68±0.04  | 2.25±0.04 | 8.7±0.3    | 17.2±0.2   | 1.49±0.05 | 1.14±0.02 | n.q.      | 0.84±0.04 | 0.36±0.00 | 0.61±0.00 | 1.16±0.05 | n.q.      | 0.22±0.02 |
| M2       | 14.1±0.5    | 2.9±0.2    | 0.62±0.07 | 2.72±0.07 | 16.4±0.3   | n.q.      | 3.08±0.00  | 3.00±0.08  | 1.72±0.02 | 1.26±0.06 | n.q.      | 0.86±0.04 | 0.45±0.01 | 0.59±0.00 | 1.04±0.02 | n.q.      | 0.16±0.01 |
| M3       | 19.13±0.04  | 5.2±0.2    | 0.37±0.01 | 0.51±0.01 | 0.82±0.00  | 0.48±0.02 | 3.7±2.0    | 12.48±0.04 | 0.92±0.03 | 1.07±0.04 | n.q.      | 0.97±0.04 | 0.47±0.04 | 1.13±0.08 | 0.44±0.04 | n.q.      | n.q.      |
| M4       | 16.2±0.4    | 6.40±0.03  | 0.32±0.01 | 0.09±0.00 | 1.19±0.02  | 0.39±0.04 | 2.60±0.02  | 13.08±0.05 | 1.41±0.01 | 0.99±0.05 | n.q.      | 1.05±0.03 | 0.41±0.01 | 1.01±0.02 | 0.64±0.00 | n.q.      | n.q.      |
| M5       | 27.8±0.2    | 10.6±0.2   | 0.61±0.01 | 1.07±0.04 | 5.0±0.1    | 0.72±0.00 | 6.5±0.1    | 39.1±0.2   | 2.56±0.04 | 1.56±0.08 | 0.16±0.00 | 1.11±0.07 | 0.50±0.00 | 1.17±0.08 | 0.73±0.05 | n.q.      | n.q.      |

n.q., not quantified; None of 5-MChr, IP, CP, DalP, DaeP, DaiP, and DahP were quantified.

**Table S4** OSI of nine types of butter (h)

| Sample | AN*  | AY   | BN   | BY   | CN*  | DN   | DY   | EN*  | EY   |
|--------|------|------|------|------|------|------|------|------|------|
| OSI    | 1.59 | 1.64 | 1.77 | 1.81 | 1.60 | 1.01 | 1.74 | 1.99 | 1.81 |

1. Li, W.; Wu, S. Halogenated polycyclic aromatic hydrocarbons and their parent compounds in ready-to-eat seafood rich in salt: Method validation, profiles, correlation, and exposure risks. *Food Control* **2022**, *136*, doi:10.1016/j.foodcont.2022.108864.
